# Supplementary material for: There Is a Future for N-Heterocyclic Carbene Iron(II) Dyes in Dye-Sensitized Solar Cells: Improving Performance through Changes in the Electrolyte
Source: PubMed Central journal article supplement (PMC6947502; doi:10.3390/ma12244181), 2019-12-12
Supplement: materials-12-04181-s001.pdf [file materials-12-04181-s001.pdf]

## Supporting Information

for

# There is a Future for *N*-Heterocyclic Carbene Iron(II) Dyes in Dye-Sensitized Solar Cells: Improving Performance Through Changes in the Electrolyte

Mariia Karpacheva, Vanessa Wyss, Catherine E. Housecroft and Edwin C. Constable

### Table of Contents

|                                                                                                                                                 |           |
|-------------------------------------------------------------------------------------------------------------------------------------------------|-----------|
| Fabrication of DSCs.....                                                                                                                        | 3         |
| <b>Electrolyte preparation</b> .....                                                                                                            | <b>3</b>  |
| EIS measurements.....                                                                                                                           | 3         |
| Tables and figures .....                                                                                                                        | 4         |
| <b>Table S1. Parameters for multiple DSCs using electrolytes with different concentration of lithium salts and IIs.</b> .....                   | <b>4</b>  |
| <b>Fig. S1. The equivalent circuit model used for fitting EIS experiments.</b> .....                                                            | <b>5</b>  |
| <b>Fig. S2. J-V curves for the multiple DSCs with electrolytes BMIIa, BMIIc, BMIIe and BMIIIf.</b> .....                                        | <b>5</b>  |
| <b>Fig. S3. J-V curves for the multiple DSCs with electrolytes PDMIIa and PDMIIb.</b> .....                                                     | <b>5</b>  |
| <b>Fig. S4. EQE spectra for multiple DSCs with electrolytes PMIIa, PMIIb, PMIIc and PMIID</b> .....                                             | <b>6</b>  |
| <b>Fig. S5. EQE spectra for multiple DSCs with electrolytes BMIIa, BMIIb, BMIIc and BMIID.</b> .....                                            | <b>6</b>  |
| <b>Fig. S6. EQE spectra for multiple DSCs with electrolytes BMIIg, BMIIh and BMIII.</b> .....                                                   | <b>7</b>  |
| <b>Fig. S7. EIS data of the multiple DSCs with electrolyte BMIIa.</b> .....                                                                     | <b>8</b>  |
| <b>Fig. S8. EIS data of the multiple DSCs with electrolyte BMIIc.</b> .....                                                                     | <b>9</b>  |
| <b>Fig. S9. EIS data of the multiple DSCs with electrolyte BMIIe.</b> .....                                                                     | <b>10</b> |
| <b>Fig. S10. EIS data of the multiple DSCs with electrolyte BMIIIf.</b> .....                                                                   | <b>11</b> |
| <b>Fig. S11. EIS data of the multiple DSCs with electrolyte BMIIh.</b> .....                                                                    | <b>12</b> |
| <b>Fig. S12. EIS data of the multiple DSCs with electrolyte BMIII.</b> .....                                                                    | <b>13</b> |
| <b>Fig. S13. Bode plot of the DSCs with electrolytes BMIIa, BMIIc, BMIIe, BMIIIf, BMIIh, BMIII.</b> .....                                       | <b>14</b> |
| <b>Table S2. EIS parameters for multiple DSCs using electrolytes with different concentrations of Lil.</b> .....                                | <b>14</b> |
| <b>Fig. S14. J-V curves for the multiple DSCs with electrolytes DMII, EMII, PMIIc, BMIIc and HMII.</b> .....                                    | <b>15</b> |
| <b>Table S3. Parameters for multiple DSCs using electrolytes based on imidazolium ionic liquids with different lengths of side-chain.</b> ..... | <b>15</b> |
| <b>Fig. S15. EIS data of the multiple DSCs with electrolyte DMII.</b> .....                                                                     | <b>16</b> |

|                                                                                                                                                    |           |
|----------------------------------------------------------------------------------------------------------------------------------------------------|-----------|
| <b>Fig. S16. EIS data of the multiple DSCs with electrolyte EMII. ....</b>                                                                         | <b>17</b> |
| <b>Fig. S17. EIS data of the multiple DSCs with electrolyte PMIIc.....</b>                                                                         | <b>18</b> |
| <b>Fig. S18. EIS data of the multiple DSCs with electrolyte HMII. ....</b>                                                                         | <b>19</b> |
| <b>Fig. S19. Bode plot of the DSCs with electrolytes BMIIa, BMIIc, BMIIe, BMII f, BMIIh, BMIIi. ....</b>                                           | <b>20</b> |
| <b>Table S4. EIS parameters for multiple DSCs using electrolytes based on imidazolium ionic liquids with different lengths of side-chain. ....</b> | <b>20</b> |
| <b>Fig. S20. EQE spectra for multiple DSCs using electrolytes DMII, EMII, PMIIc, BMIIc and HMII. ....</b>                                          | <b>21</b> |
| <b>Fig. S21. J-V curves for the multiple DSCs with electrolytes based on imidazolium ionic liquids with different counter ions. ....</b>           | <b>21</b> |
| <b>Table S5. Parameters for multiple DSCs using electrolytes based on imidazolium ionic liquids with different counter ions.....</b>               | <b>22</b> |

## Fabrication of DSCs

Each working commercial TiO<sub>2</sub> electrode (opaque, Solaronix) was rinsed with EtOH and dried on a heating plate at 450 °C for 30 min. The electrodes were cooled to 60 °C and immersed in an iron(II) dye **2** (0.5 mM) acetonitrile solution containing chenodeoxycholic acid (0.1 mM) overnight. The reference working electrode was made by dipping a commercial electrode in an 0.3 mM EtOH solution of N719 (Solaronix) overnight. After soaking in the dye-baths, the electrodes were washed with the same solvent as used in the dye-bath (in case of MeCN the electrodes were washed second time with acetone) and dried with a heat gun.

Commercial counter electrodes from Solaronix (Test Cell Platinum Electrodes Drilled) were rinsed with EtOH and dried on a heating plate at 450 °C for 30 min. The TiO<sub>2</sub> electrodes and Pt counter-electrodes were assembled using thermoplast hot-melt sealing foil (Solaronix, Test Cell Gaskets, made from Meltonix 1170-60 sealing film, 60 microns thick) by heating while pressing them together. The electrolytes were introduced into DSCs by vacuum backfilling through a hole drilled in the counter electrode and this was then sealed using hot-melt sealing foil and a cover glass.

The solar cell measurements used fully masked cells using black coloured copper sheet with a single aperture placed over the screen printed dye-sensitized TiO<sub>2</sub> square. The area of the aperture in the mask was smaller than the active area of the dye-sensitized TiO<sub>2</sub> (0.36 cm<sup>2</sup>). For complete masking, black tape was also applied over the edges and rear of the cell. Current density-voltage (*J*-*V*) measurements were made by irradiating from behind with a LOT Quantum Design LS0811 instrument (100 mW cm<sup>-2</sup> = 1 sun at AM 1.5) and the simulated light power was calibrated with a silicon reference cell.

The external quantum efficiency (EQE) measurements were performed on a Spe-Quest quantum efficiency setup from Rera Systems (Netherlands) equipped with a 100W halogen lamp (QTH) and a lambda 300 grating monochromator from Lot Oriel. The monochromatic light was modulated to 1 Hz using a chopper wheel from ThorLabs. The cell response was amplified with a large dynamic range IV converter from CVI Melles Griot and then measured with a SR830 DSP Lock-In amplifier from Stanford Research.

### Electrolyte preparation

The electrolyte compositions were as given in Tables 1, 4 and 6. BMII was purchased from Sigma-Aldrich, PMII, EMII, HMII, BDMIBF, BDMIPF, PMIBF, PMINCFSO were purchased from TCI, DMII and PDMII were purchased from Fluorochem, BDMICFSO and MPN were bought from Acros Organics and Fluka, respectively.

### EIS measurements

For the EIS measurements a ModuLab<sup>®</sup> XM PhotoEchem photoelectrochemical measurement system from Solartron Analytical was used. The impedance was measured at the open-circuit potential of the cell at a light intensity of 22 mW cm<sup>-2</sup> (590 nm) in the frequency range 0.05 Hz to 100 kHz using an amplitude of 10 mV. The impedance data were analysed using ZView<sup>®</sup> software from Scribner Associates Inc.

## Tables and figures

Table S1. Parameters for multiple DSCs using electrolytes with different concentration of lithium salts and ILs.

| Electrolyte   | $J_{sc} / \text{mA cm}^{-2}$ | $V_{oc} / \text{mV}$ | $ff / \%$ | $\eta / \%$ | Rel. $\eta / \%$ |
|---------------|------------------------------|----------------------|-----------|-------------|------------------|
| PMIIa cell 1  | 2.34                         | 371                  | 66        | 0.57        | 10.2             |
| PMIIa cell 2  | 2.26                         | 354                  | 66        | 0.53        | 9.5              |
| PMIIa cell 3  | 2.41                         | 355                  | 65        | 0.56        | 10.0             |
| PMIIa cell 4  | 2.69                         | 373                  | 63        | 0.63        | 11.3             |
| PMIIb cell 1  | 2.71                         | 264                  | 57        | 0.41        | 7.3              |
| PMIIb cell 2  | 2.35                         | 285                  | 60        | 0.40        | 7.1              |
| PMIIb cell 3  | 2.66                         | 265                  | 58        | 0.41        | 7.3              |
| PMIIb cell 4  | 2.77                         | 288                  | 60        | 0.48        | 8.6              |
| PMIIc cell 1  | 3.01                         | 315                  | 62        | 0.59        | 10.5             |
| PMIIc cell 2  | 2.98                         | 270                  | 62        | 0.50        | 8.9              |
| PMIIc cell 3  | 2.98                         | 318                  | 63        | 0.59        | 10.5             |
| PMIIc cell 4  | -                            | -                    | -         | -           | -                |
| PMIId cell 1  | 3.91                         | 281                  | 53        | 0.59        | 10.5             |
| PMIId cell 2  | 3.44                         | 296                  | 54        | 0.55        | 9.8              |
| PMIId cell 3  | 3.45                         | 301                  | 56        | 0.58        | 10.4             |
| PMIId cell 4  | 2.85                         | 284                  | 60        | 0.48        | 8.6              |
| BMIIa cell 1  | 2.42                         | 374                  | 61        | 0.55        | 9.8              |
| BMIIa cell 2  | 2.38                         | 340                  | 64        | 0.52        | 9.3              |
| BMIIa cell 3  | 2.20                         | 366                  | 63        | 0.51        | 9.1              |
| BMIIa cell 4  | 2.18                         | 318                  | 64        | 0.45        | 8.0              |
| BMIIb cell 1  | 1.77                         | 359                  | 62        | 0.39        | 6.9              |
| BMIIb cell 2  | 1.54                         | 361                  | 65        | 0.37        | 6.6              |
| BMIIb cell 3  | 1.56                         | 366                  | 66        | 0.38        | 6.8              |
| BMIIb cell 4  | 1.57                         | 372                  | 66        | 0.38        | 6.8              |
| BMIIc cell 1  | 3.40                         | 301                  | 59        | 0.61        | 10.9             |
| BMIIc cell 2  | 3.56                         | 311                  | 57        | 0.63        | 11.3             |
| BMIIc cell 3  | 3.51                         | 291                  | 58        | 0.59        | 10.5             |
| BMIIc cell 4  | 3.40                         | 294                  | 60        | 0.60        | 10.7             |
| BMII d cell 1 | 3.13                         | 315                  | 59        | 0.58        | 10.4             |
| BMII d cell 2 | 2.65                         | 313                  | 62        | 0.51        | 9.1              |
| BMII d cell 3 | 2.92                         | 307                  | 61        | 0.55        | 9.8              |
| BMII d cell 4 | 3.10                         | 330                  | 60        | 0.61        | 10.9             |
| BMIIe cell 1  | 3.02                         | 299                  | 62        | 0.56        | 10.0             |
| BMIIe cell 2  | 2.79                         | 288                  | 64        | 0.51        | 9.1              |
| BMIIe cell 3  | 3.08                         | 286                  | 62        | 0.55        | 9.8              |
| BMIIe cell 4  | 3.10                         | 306                  | 63        | 0.60        | 10.7             |
| BMII f cell 1 | 3.45                         | 307                  | 60        | 0.64        | 11.4             |
| BMII f cell 2 | 3.49                         | 302                  | 62        | 0.65        | 11.6             |
| BMII f cell 3 | 3.38                         | 298                  | 61        | 0.62        | 11.1             |
| BMII f cell 4 | 3.46                         | 292                  | 61        | 0.61        | 10.9             |
| BMII g cell 1 | 3.33                         | 298                  | 62        | 0.62        | 11.1             |
| BMII g cell 2 | 3.03                         | 272                  | 63        | 0.52        | 9.3              |
| BMII g cell 3 | 3.62                         | 293                  | 60        | 0.64        | 11.4             |
| BMII g cell 4 | 3.35                         | 277                  | 61        | 0.57        | 10.2             |
| BMII h cell 1 | 3.46                         | 301                  | 60        | 0.63        | 11.3             |
| BMII h cell 2 | 3.58                         | 263                  | 47        | 0.44        | 7.9              |
| BMII h cell 3 | 3.86                         | 311                  | 55        | 0.66        | 11.8             |
| BMII h cell 4 | 3.32                         | 281                  | 58        | 0.54        | 9.6              |
| BMII i cell 1 | 3.61                         | 264                  | 62        | 0.59        | 10.5             |
| BMII i cell 2 | 3.98                         | 264                  | 61        | 0.64        | 11.4             |
| BMII i cell 3 | 3.49                         | 246                  | 60        | 0.52        | 9.3              |
| BMII i cell 4 | 3.78                         | 220                  | 60        | 0.50        | 8.9              |
| PDMIIa cell 1 | 3.27                         | 348                  | 58        | 0.66        | 11.8             |
| PDMIIa cell 2 | 3.41                         | 346                  | 54        | 0.64        | 11.4             |
| PDMIIb cell 1 | 3.21                         | 337                  | 57        | 0.62        | 11.1             |
| PDMIIb cell 2 | 3.01                         | 318                  | 60        | 0.57        | 10.2             |
| PMIIe cell 1  | 2.80                         | 368                  | 62        | 0.64        | 11.4             |
| PMIIe cell 2  | 2.71                         | 390                  | 60        | 0.64        | 11.4             |
| PMIIe cell 3  | 2.80                         | 360                  | 62        | 0.62        | 11.1             |
| PMIIe cell 4  | 2.70                         | 366                  | 63        | 0.62        | 11.1             |
| N719          | 12.53                        | 654                  | 68        | 5.60        | 100              |

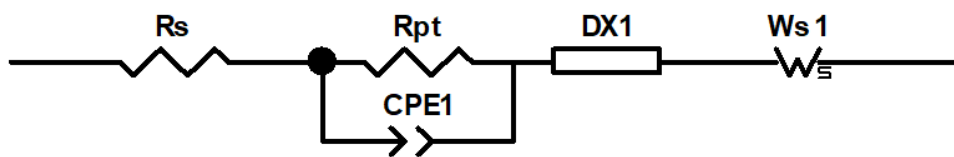

Fig. S1. The equivalent circuit model used for fitting EIS experiments.

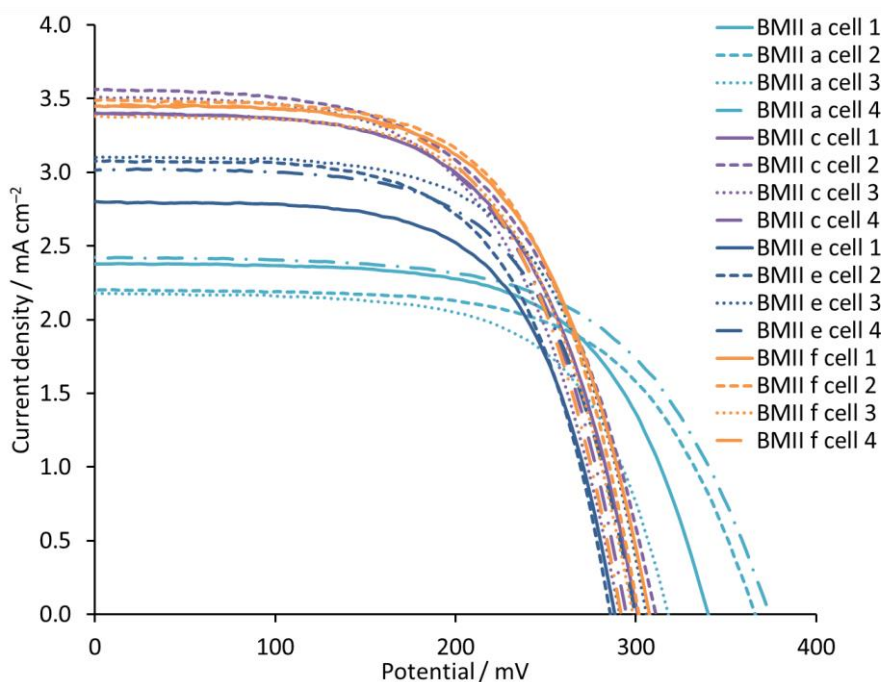

Fig. S2. J-V curves for the multiple DSCs with electrolytes BMIIa, BMIIc, BMIIe and BMII f.

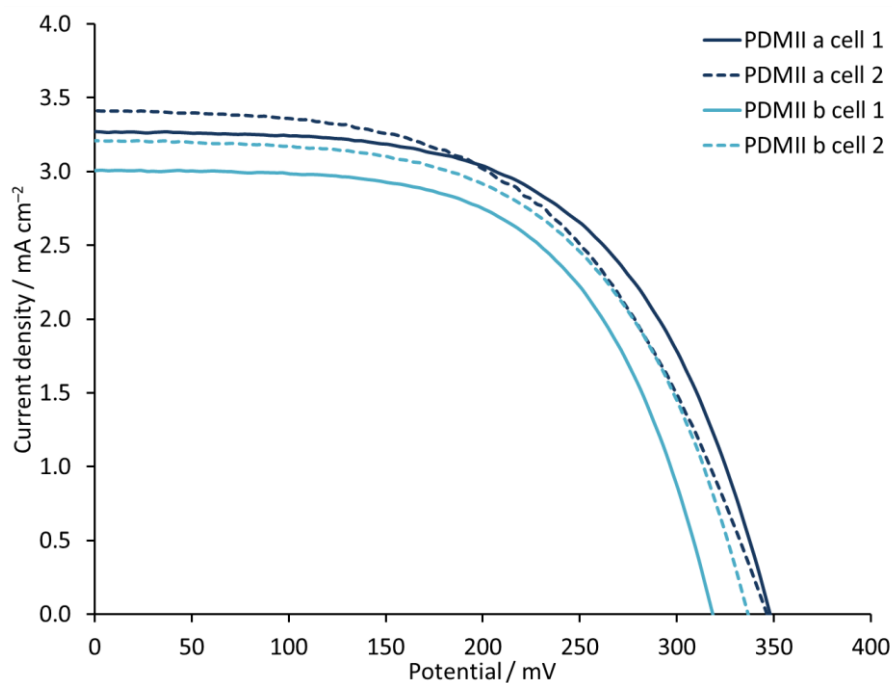

Fig. S3. J-V curves for the multiple DSCs with electrolytes PDMIIa and PDMIIb.

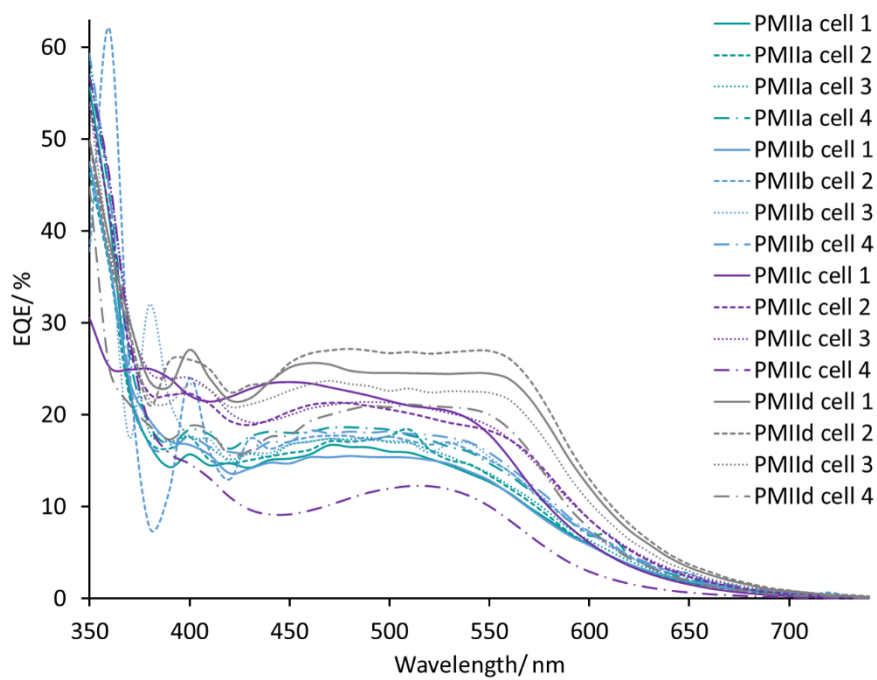

Fig. S4. EQE spectra for multiple DSCs with electrolytes PMIIa, PMIIb, PMIIc and PMIId

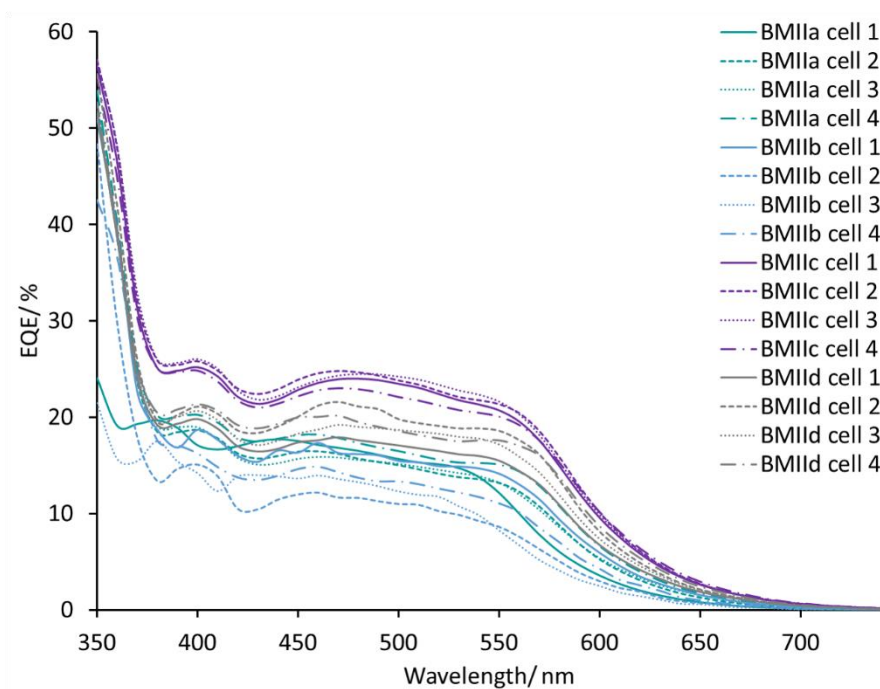

Fig. S5. EQE spectra for multiple DSCs with electrolytes BMIIa, BMIIb, BMIIc and BMIId.

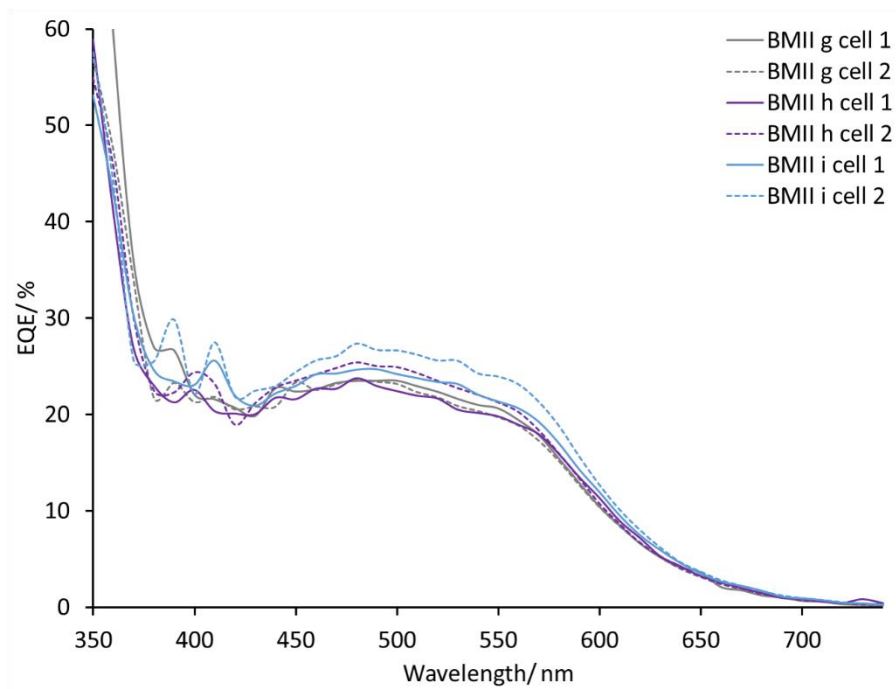

Fig. S6. EQE spectra for multiple DSCs with electrolytes BMIIg, BMIIh and BMIII.

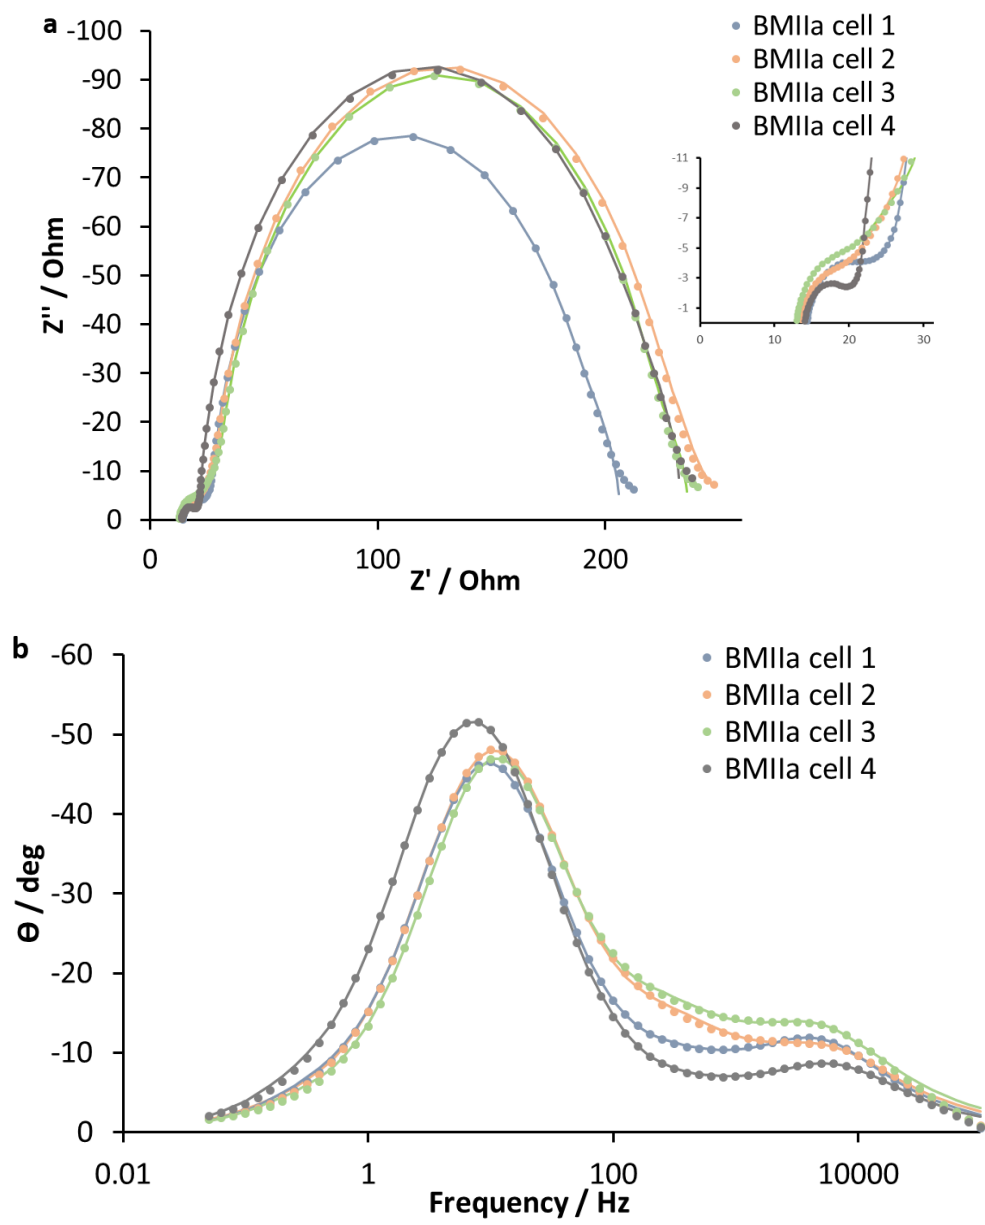

Fig. S7. EIS data of the multiple DSCs with electrolyte BMIIa. Solid lines represent fitted curves, dotted lines represent experimental data. (a) Nyquist plots, the expansion shows the high frequency region. (b) Bode plot



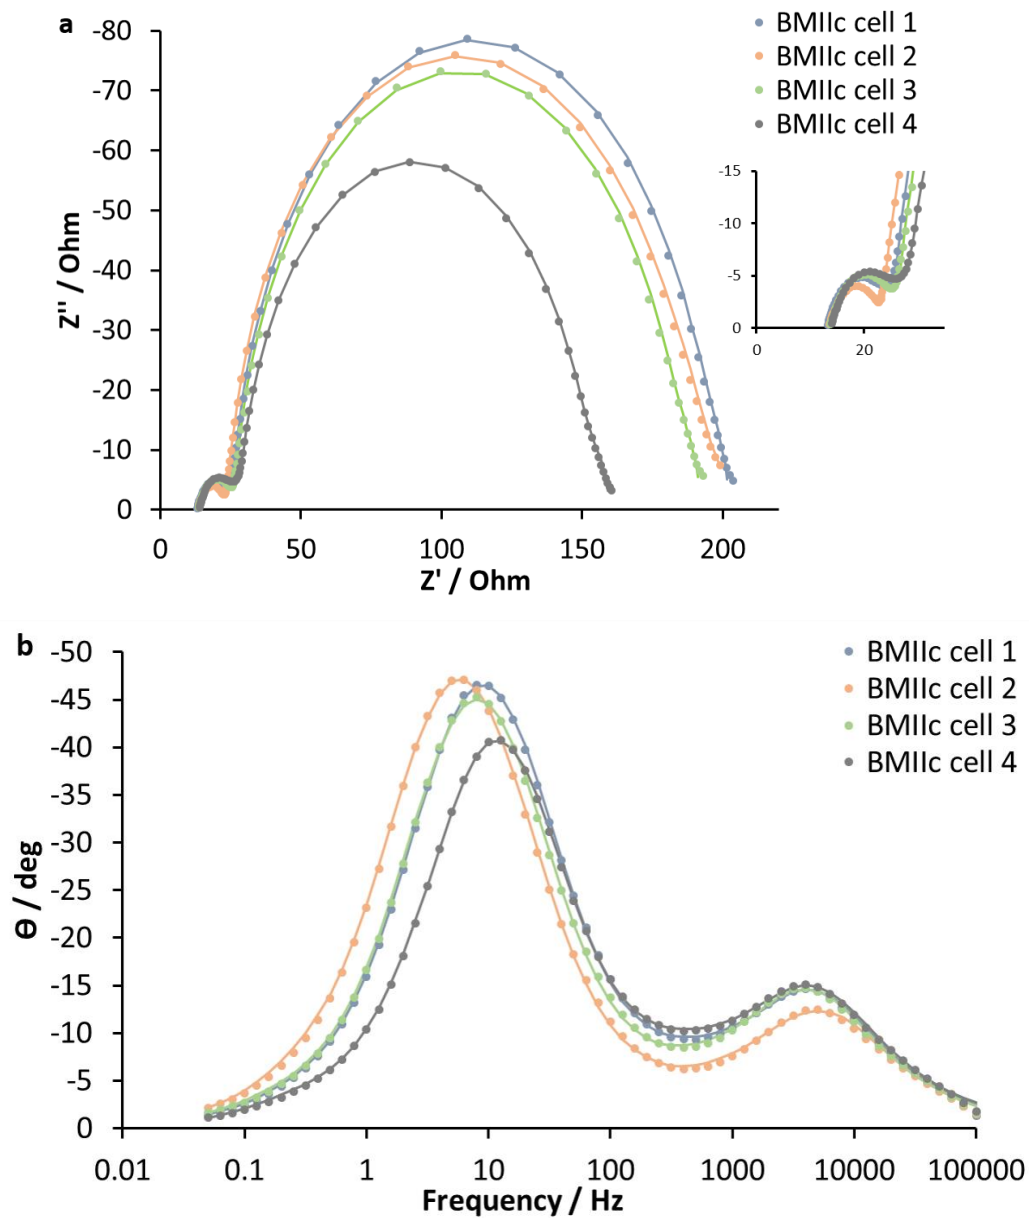

Fig. S8. EIS data of the multiple DSCs with electrolyte BMIIc. Solid lines represent fitted curves, dotted lines represent experimental data. (a) Nyquist plots, the expansion shows the high frequency region. (b) Bode plot.

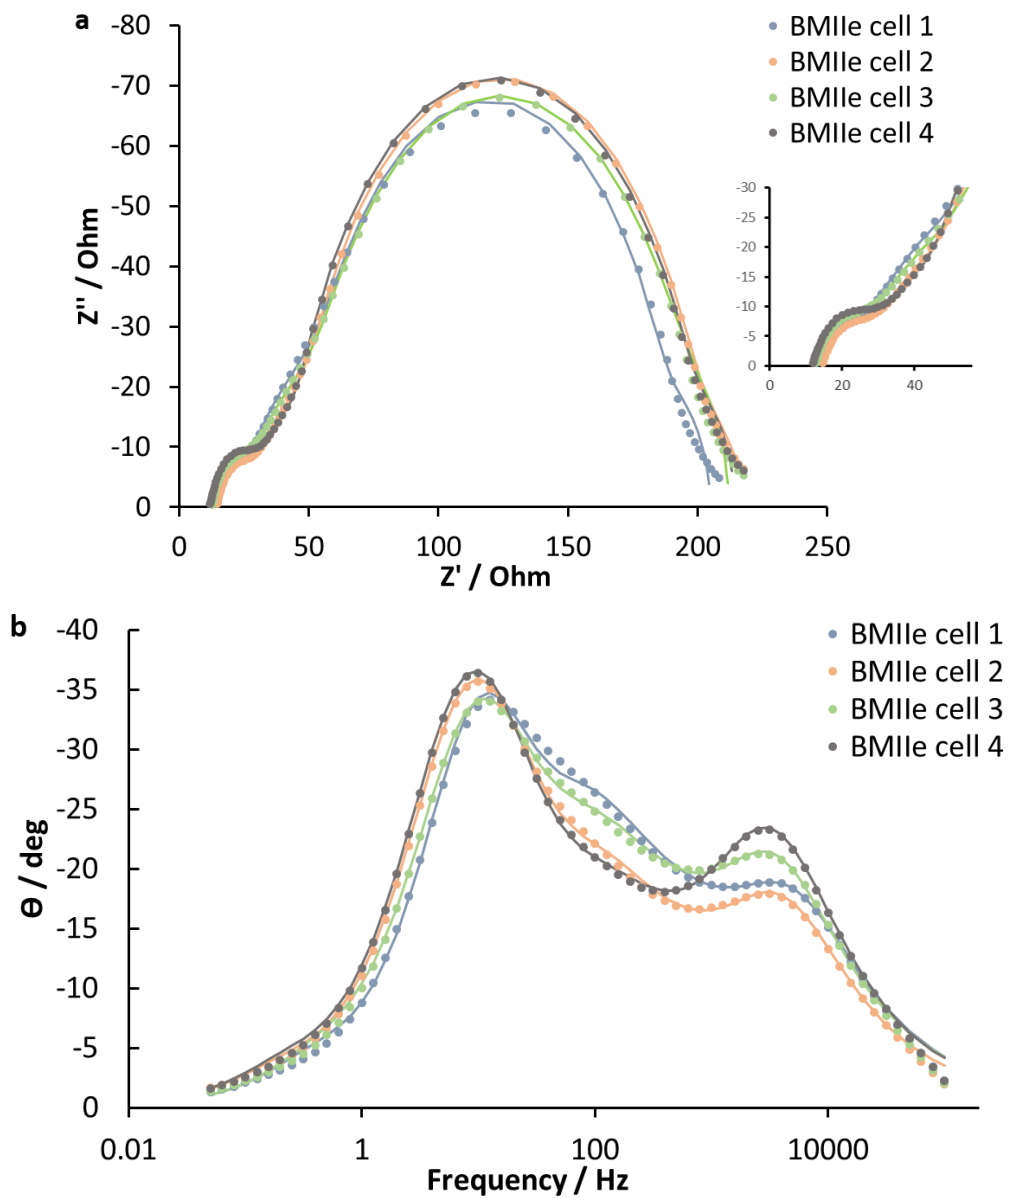

Fig. S9. EIS data of the multiple DSCs with electrolyte BMIIe. Solid lines represent fitted curves, dotted lines represent experimental data. (a) Nyquist plots, the expansion shows the high frequency region. (b) Bode plot.

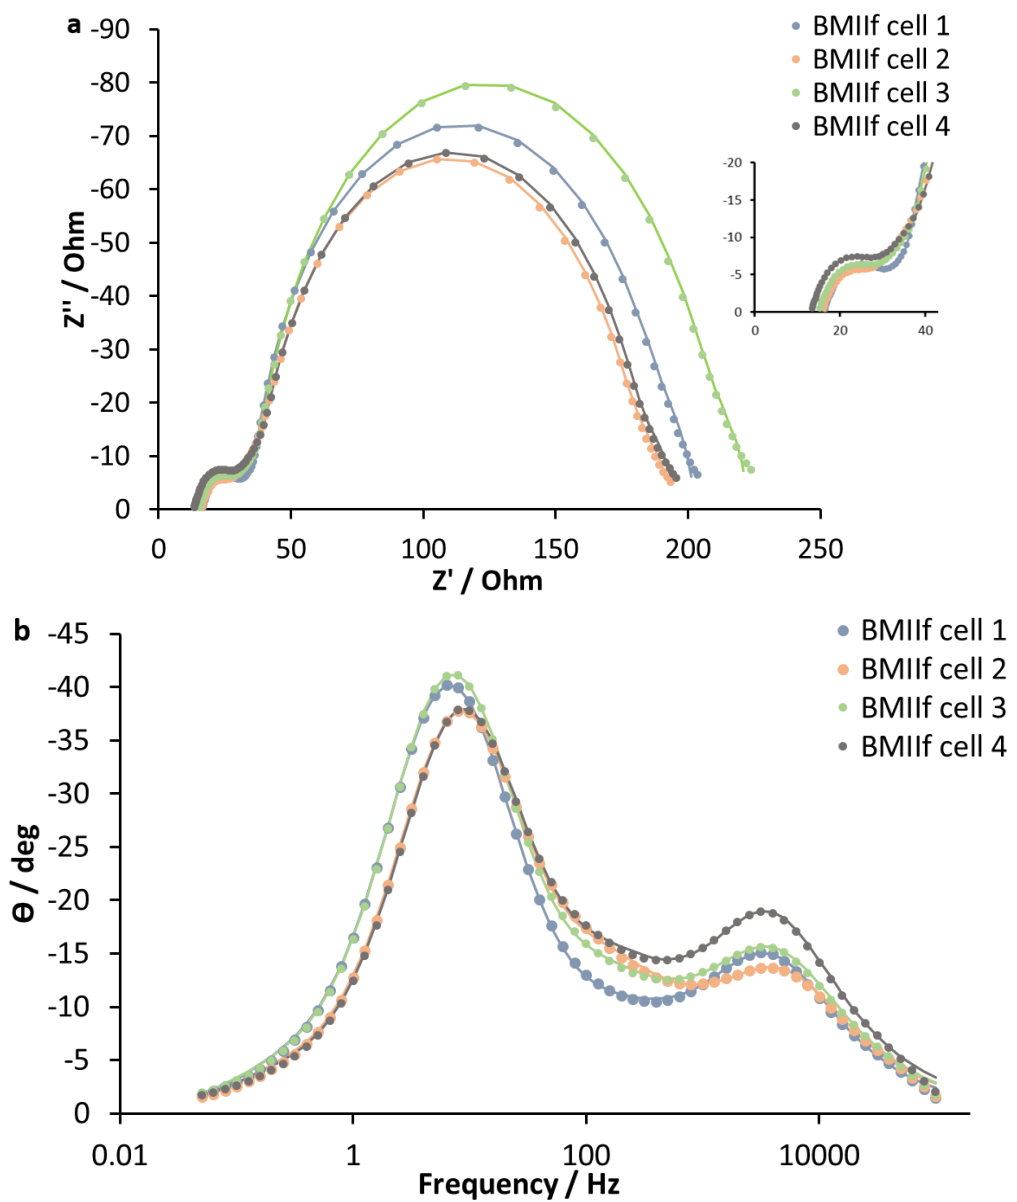

Fig. S10. EIS data of the multiple DSCs with electrolyte BMIIf. Solid lines represent fitted curves, dotted lines represent experimental data. (a) Nyquist plots, the expansion shows the high frequency region. (b) Bode plot.

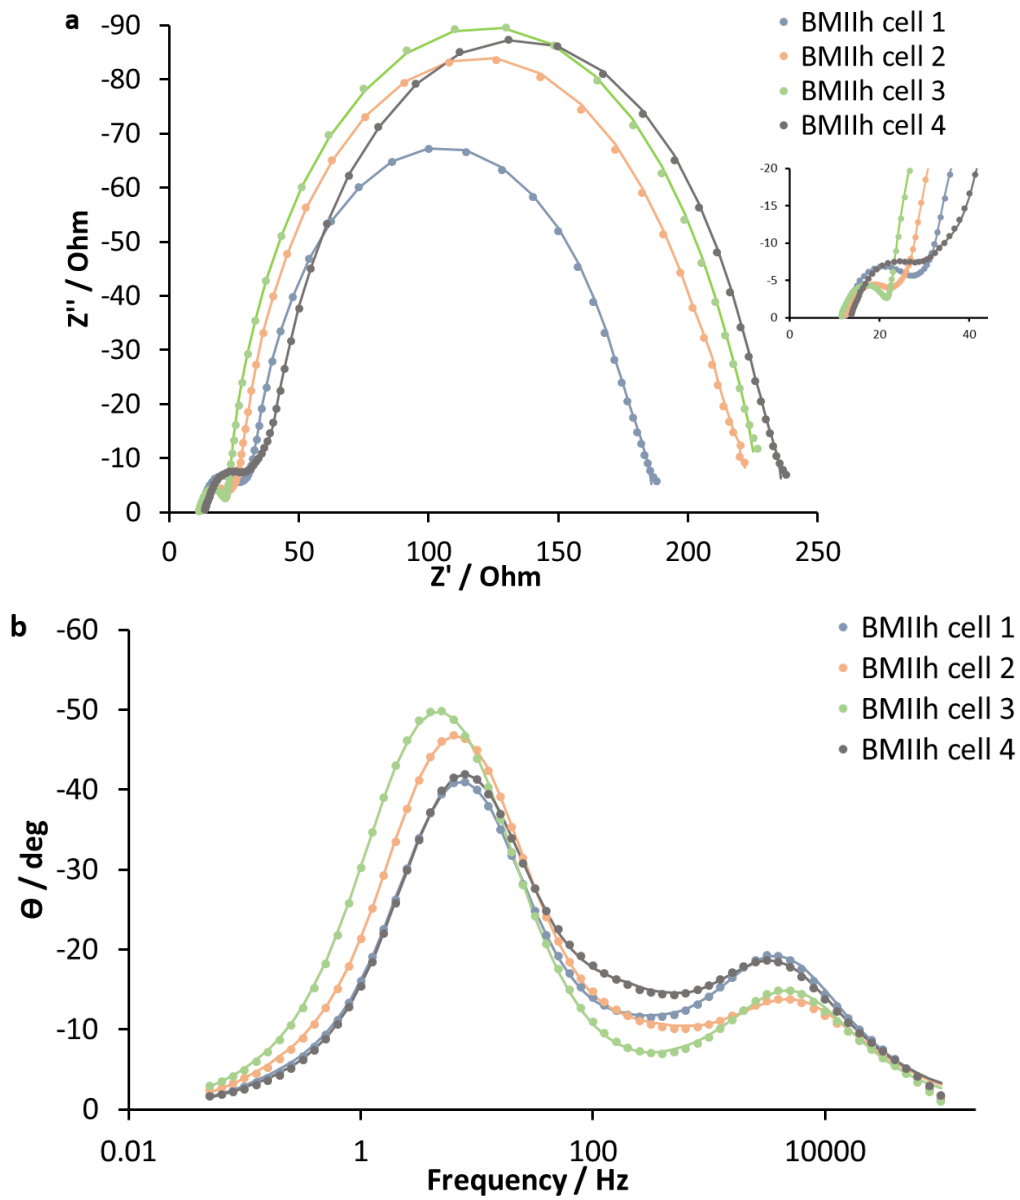

Fig. S11. EIS data of the multiple DSCs with electrolyte BMIIh. Solid lines represent fitted curves, dotted lines represent experimental data. (a) Nyquist plots, the expansion shows the high frequency region. (b) Bode plot.

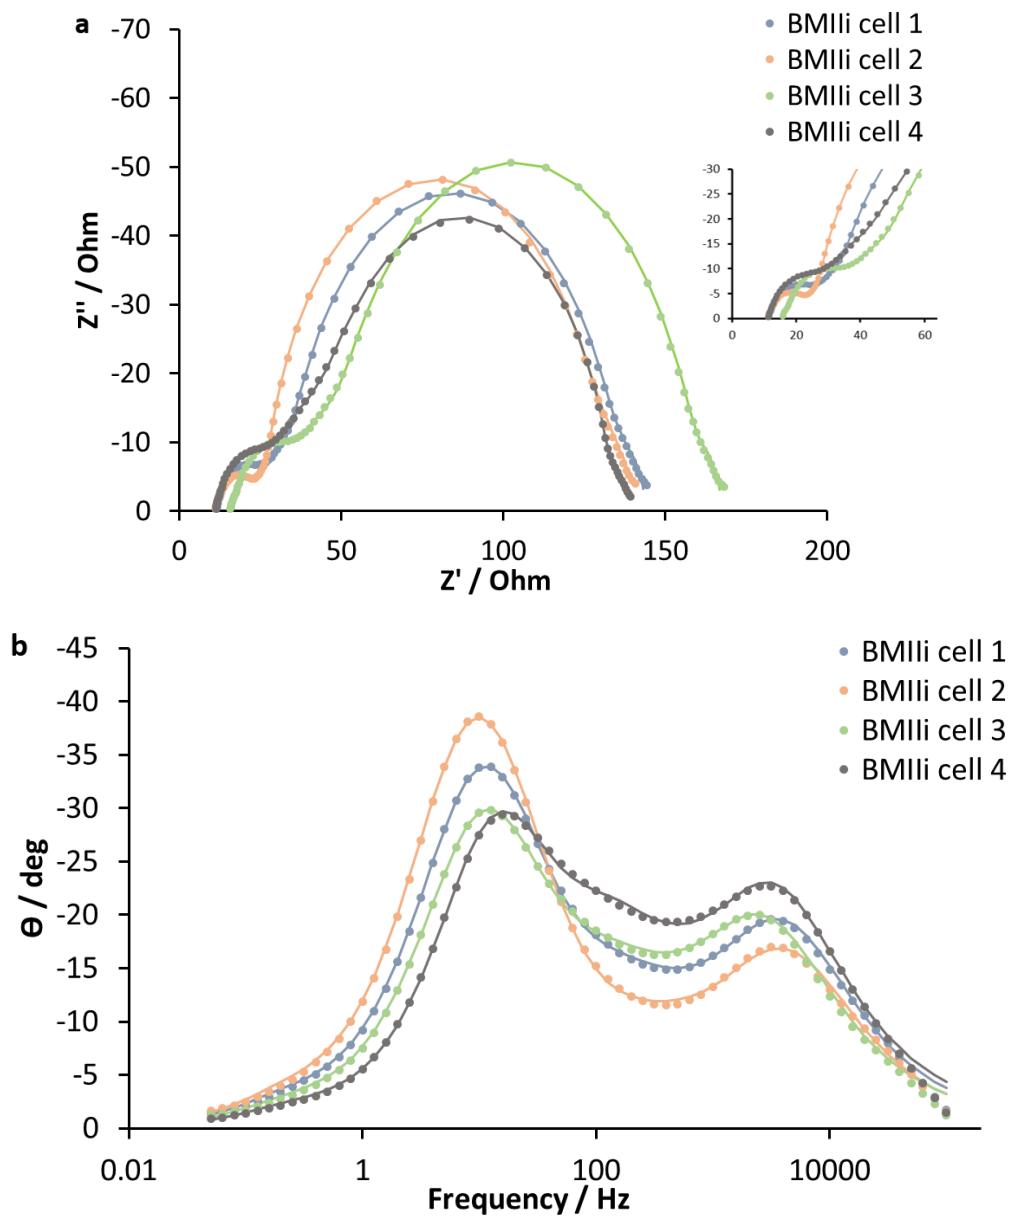

Fig. S12. EIS data of the multiple DSCs with electrolyte BMIII. Solid lines represent fitted curves, dotted lines represent experimental data. (a) Nyquist plots, the expansion shows the high frequency region. (b) Bode plot.

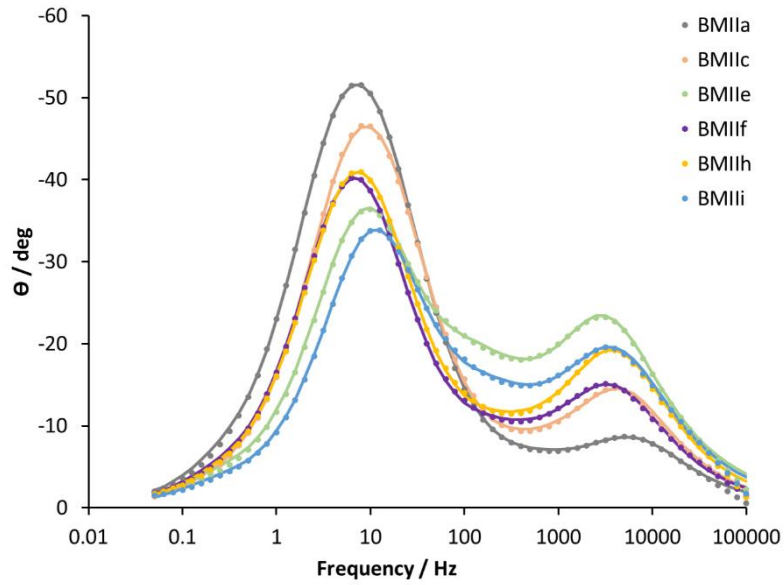

Fig. S13. Bode plot of the DSCs with electrolytes BMIIa, BMIIc, BMIIe, BMIIIf, BMIIh, BMIIi. Solid lines represent fitted curves, dotted lines represent experimental data.

Table S2. EIS parameters for multiple DSCs using electrolytes with different concentrations of Lil.

| Electrolyte   | $R_{rec} / \Omega$ | $C_{\mu} / \mu F$ | $R_{tr} / \Omega$ | $\tau / ms$ | $\tau_t / ms$ | $Ld / \mu m$ | $R_s / \Omega$ | $R_{Pt} / \Omega$ | $C_{Pt} / \mu F$ |
|---------------|--------------------|-------------------|-------------------|-------------|---------------|--------------|----------------|-------------------|------------------|
| BMIIa cell 1  | 161                | 288               | 19                | 47          | 5             | 35           | 14             | 6                 | 7                |
| BMIIa cell 2  | 199                | 233               | 32                | 46          | 7             | 30           | 13             | 3                 | 9                |
| BMIIa cell 3  | 191                | 214               | 38                | 41          | 8             | 27           | 12             | 5                 | 9                |
| BMIIa cell 4  | 192                | 384               | 9                 | 74          | 3             | 56           | 14             | 4                 | 6                |
| BMIIc cell 1  | 169                | 307               | 13                | 52          | 4             | 43           | 13             | 8                 | 6                |
| BMIIc cell 2  | 160                | 506               | 6                 | 81          | 3             | 63           | 14             | 8                 | 5                |
| BMIIc cell 3  | 157                | 352               | 11                | 55          | 4             | 46           | 14             | 9                 | 5                |
| BMIIc cell 4  | 122                | 267               | 17                | 33          | 5             | 32           | 14             | 9                 | 5                |
| BMIIe cell 1  | 130                | 214               | 109               | 28          | 23            | 13           | 12             | 6                 | 7                |
| BMIIe cell 2  | 151                | 245               | 80                | 37          | 20            | 16           | 14             | 8                 | 7                |
| BMIIe cell 3  | 141                | 226               | 101               | 32          | 23            | 14           | 12             | 7                 | 9                |
| BMIIe cell 4  | 150                | 258               | 69                | 39          | 18            | 18           | 11             | 11                | 7                |
| BMIIIf cell 1 | 152                | 374               | 26                | 57          | 10            | 29           | 16             | 11                | 5                |
| BMIIIf cell 2 | 140                | 307               | 45                | 43          | 14            | 21           | 16             | 7                 | 6                |
| BMIIIf cell 3 | 169                | 328               | 38                | 56          | 12            | 25           | 15             | 10                | 6                |
| BMIIIf cell 4 | 142                | 292               | 45                | 41          | 13            | 21           | 13             | 11                | 6                |
| BMIIh cell 1  | 144                | 378               | 23                | 54          | 9             | 30           | 12             | 12                | 5                |
| BMIIh cell 2  | 180                | 403               | 19                | 72          | 8             | 36           | 12             | 8                 | 8                |
| BMIIh cell 3  | 197                | 590               | 7                 | 116         | 4             | 65           | 12             | 8                 | 5                |
| BMIIh cell 4  | 187                | 279               | 46                | 52          | 13            | 24           | 14             | 10                | 6                |
| BMIIi cell 1  | 99                 | 302               | 40                | 30          | 12            | 19           | 11             | 10                | 6                |
| BMIIi cell 2  | 103                | 369               | 19                | 38          | 7             | 28           | 11             | 9                 | 6                |
| BMIIi cell 3  | 108                | 241               | 66                | 26          | 16            | 15           | 16             | 13                | 7                |
| BMIIi cell 4  | 86                 | 223               | 76                | 19          | 17            | 13           | 11             | 10                | 7                |

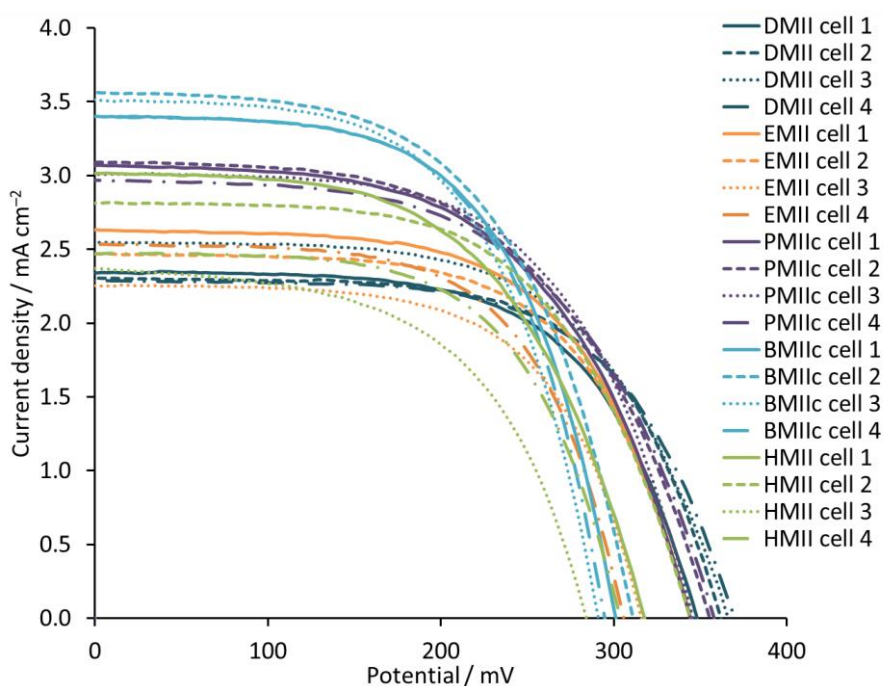

Fig. S14. J-V curves for the multiple DSCs with electrolytes DMII, EMII, PMIIc, BMIIc and HMIc.

Table S3. Parameters for multiple DSCs using electrolytes based on imidazolium ionic liquids with different lengths of side-chain.

| Electrolyte  | $J_{sc} / \text{mA cm}^{-2}$ | $V_{oc} / \text{mV}$ | $ff / \%$ | $\eta / \%$ | Rel. $\eta / \%$ |
|--------------|------------------------------|----------------------|-----------|-------------|------------------|
| DMII cell 1  | 2.31                         | 362                  | 63        | 0.53        | 9.5              |
| DMII cell 2  | 2.35                         | 348                  | 62        | 0.50        | 8.9              |
| DMII cell 3  | 2.55                         | 366                  | 60        | 0.56        | 10.0             |
| DMII cell 4  | 2.29                         | 370                  | 62        | 0.52        | 9.3              |
| EMII c ell 1 | 2.47                         | 344                  | 62        | 0.52        | 9.3              |
| EMII c ell 2 | 2.63                         | 344                  | 61        | 0.55        | 9.8              |
| EMII c ell 3 | 2.25                         | 316                  | 62        | 0.44        | 7.9              |
| EMII c ell 4 | 2.53                         | 306                  | 62        | 0.48        | 8.6              |
| PMIIc cell 1 | 3.01                         | 315                  | 62        | 0.59        | 10.5             |
| PMIIc cell 2 | 2.98                         | 270                  | 62        | 0.50        | 8.9              |
| PMIIc cell 3 | 2.98                         | 318                  | 63        | 0.59        | 10.5             |
| PMIIc cell 4 | -                            | -                    | -         | -           | -                |
| BMIIc cell 1 | 3.40                         | 301                  | 59        | 0.61        | 10.9             |
| BMIIc cell 2 | 3.56                         | 311                  | 57        | 0.63        | 11.3             |
| BMIIc cell 3 | 3.51                         | 291                  | 58        | 0.59        | 10.5             |
| BMIIc cell 4 | 3.40                         | 294                  | 60        | 0.60        | 10.7             |
| HMIc cell 1  | 3.14                         | 316                  | 60        | 0.60        | 10.7             |
| HMIc cell 2  | 3.00                         | 317                  | 62        | 0.59        | 10.5             |
| HMIc cell 3  | 3.05                         | 333                  | 62        | 0.63        | 11.3             |
| HMIc cell 4  | 3.13                         | 317                  | 61        | 0.61        | 10.9             |
| N719         | 12.53                        | 654                  | 68        | 5.60        | 100              |

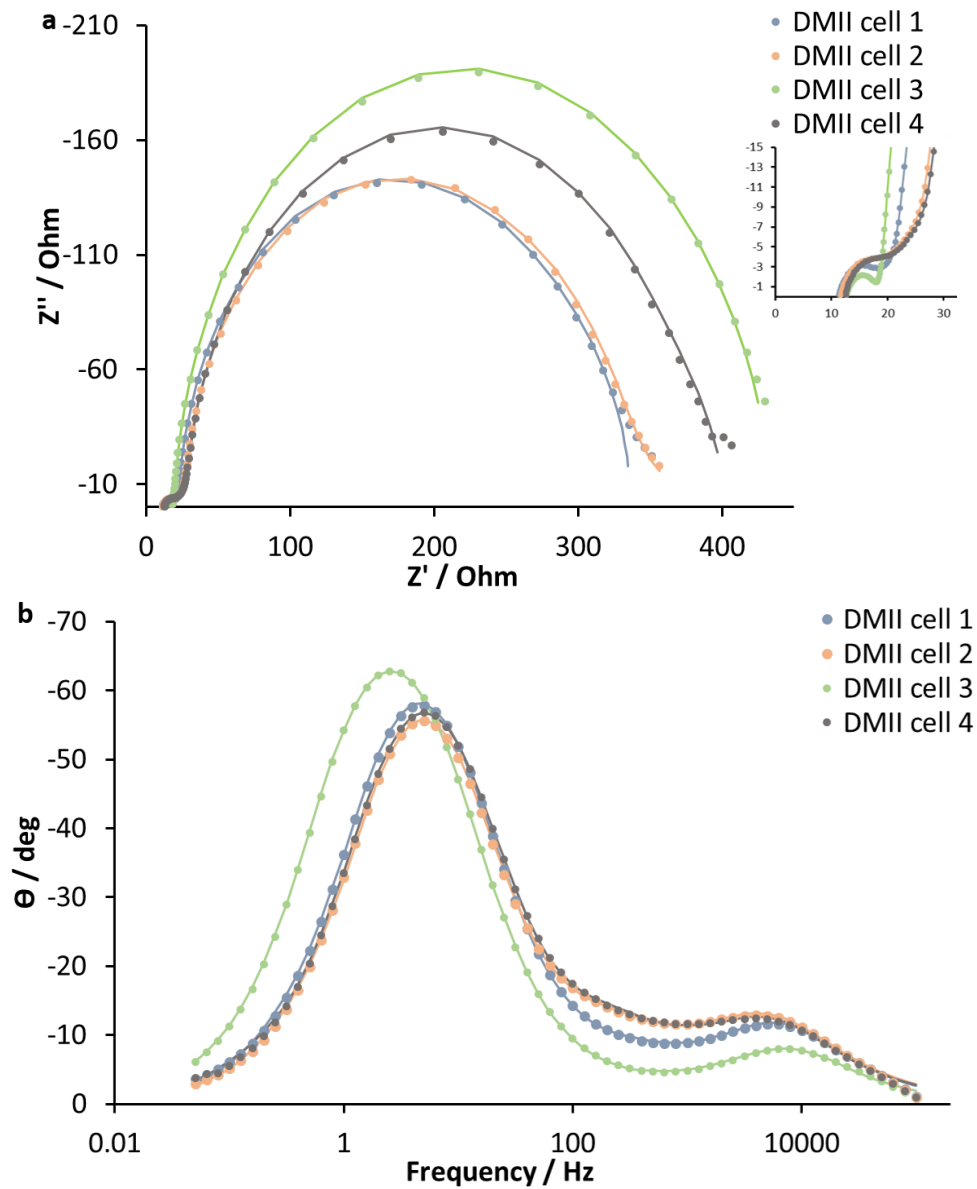

Fig. S15. EIS data of the multiple DSCs with electrolyte DMII. Solid lines represent fitted curves, dotted lines represent experimental data. (a) Nyquist plots, the expansion shows the high frequency region. (b) Bode plot.



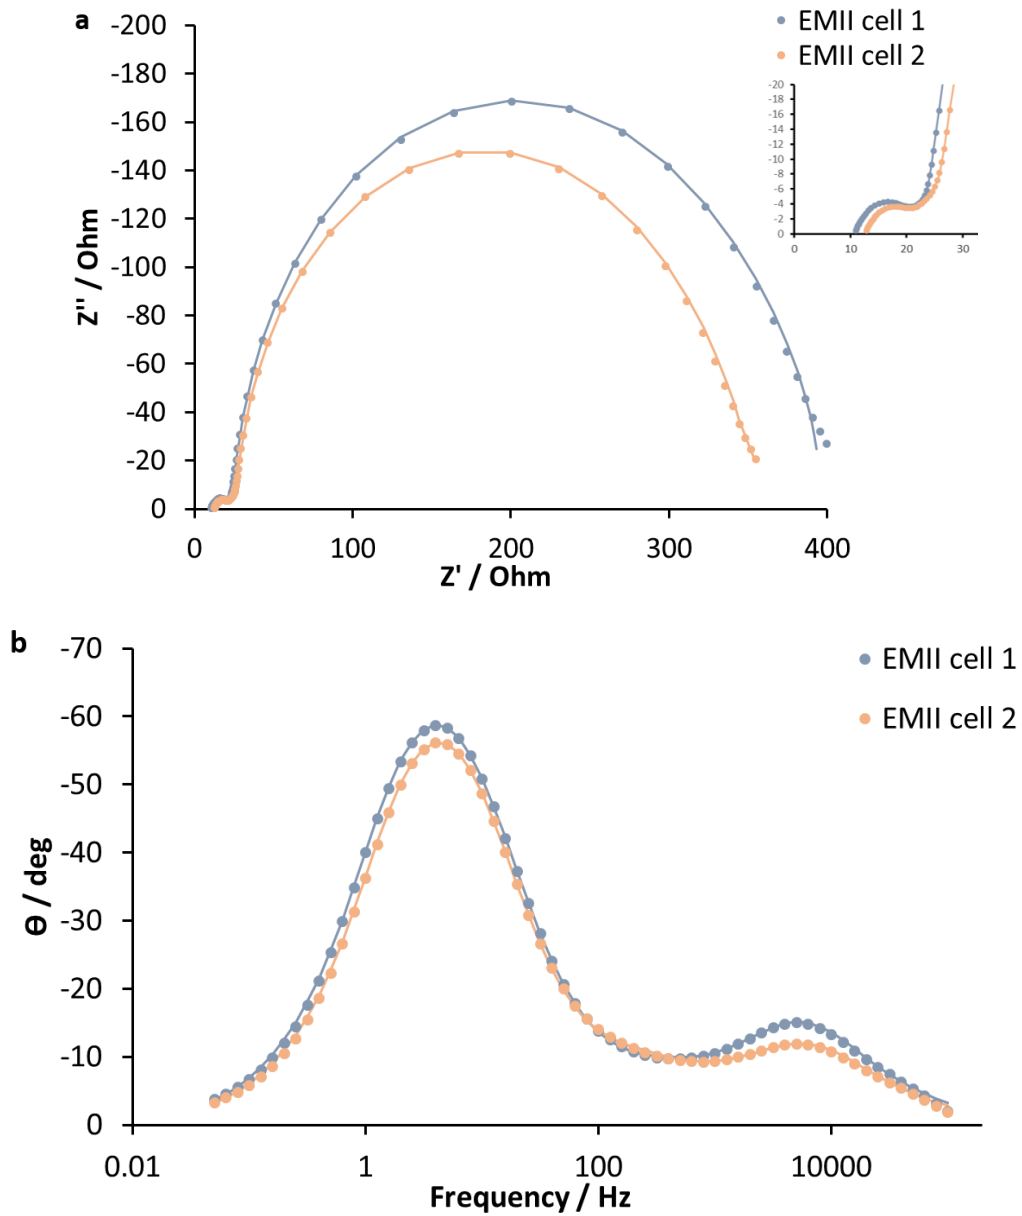

Fig. S16. EIS data of the multiple DSCs with electrolyte EMII. Solid lines represent fitted curves, dotted lines represent experimental data. (a) Nyquist plots, the expansion shows the high frequency region. (b) Bode plot.

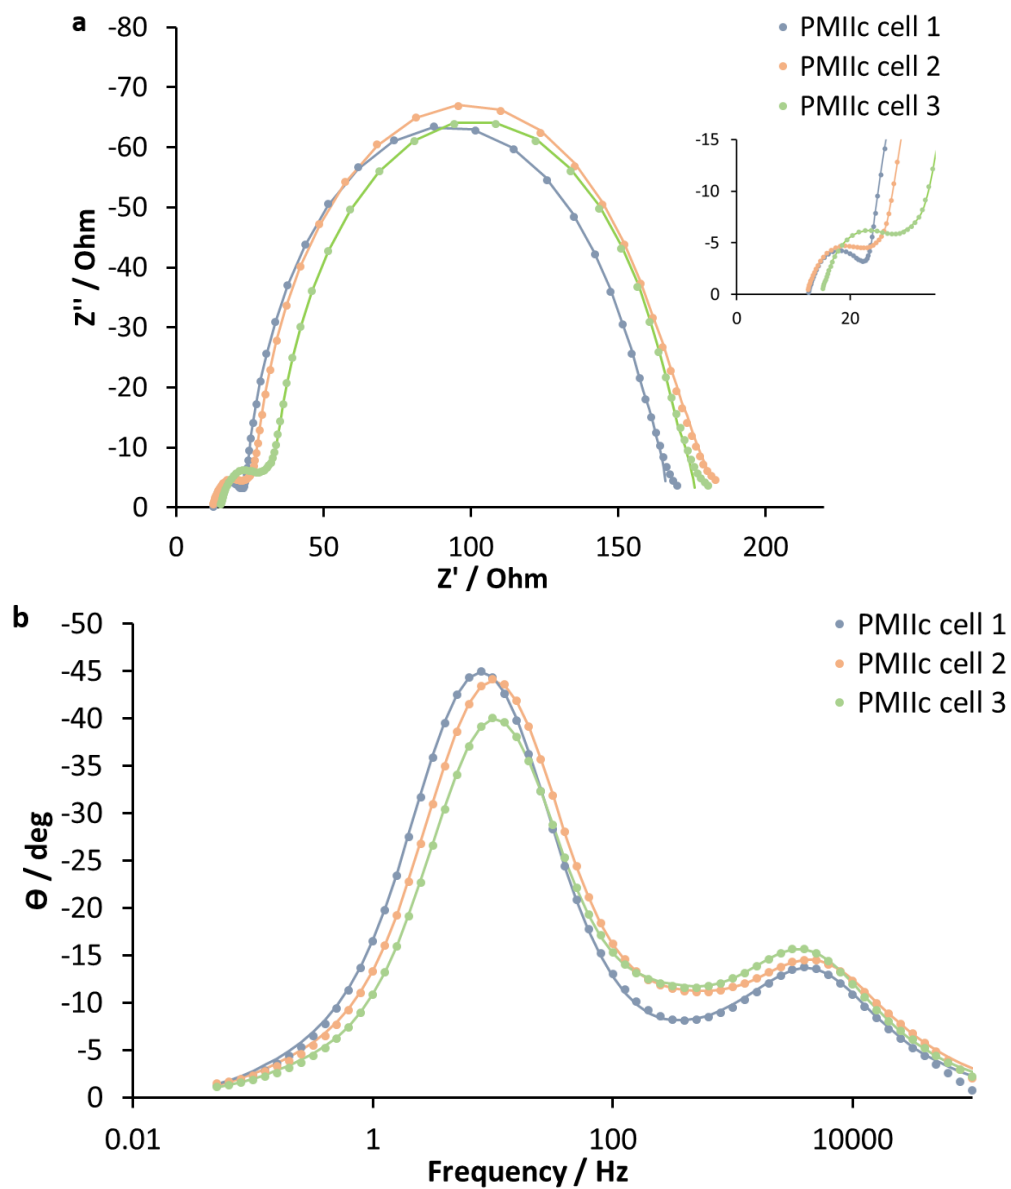

Fig. S17. EIS data of the multiple DSCs with electrolyte PMIIc. Solid lines represent fitted curves, dotted lines represent experimental data. (a) Nyquist plots, the expansion shows the high frequency region. (b) Bode plot.

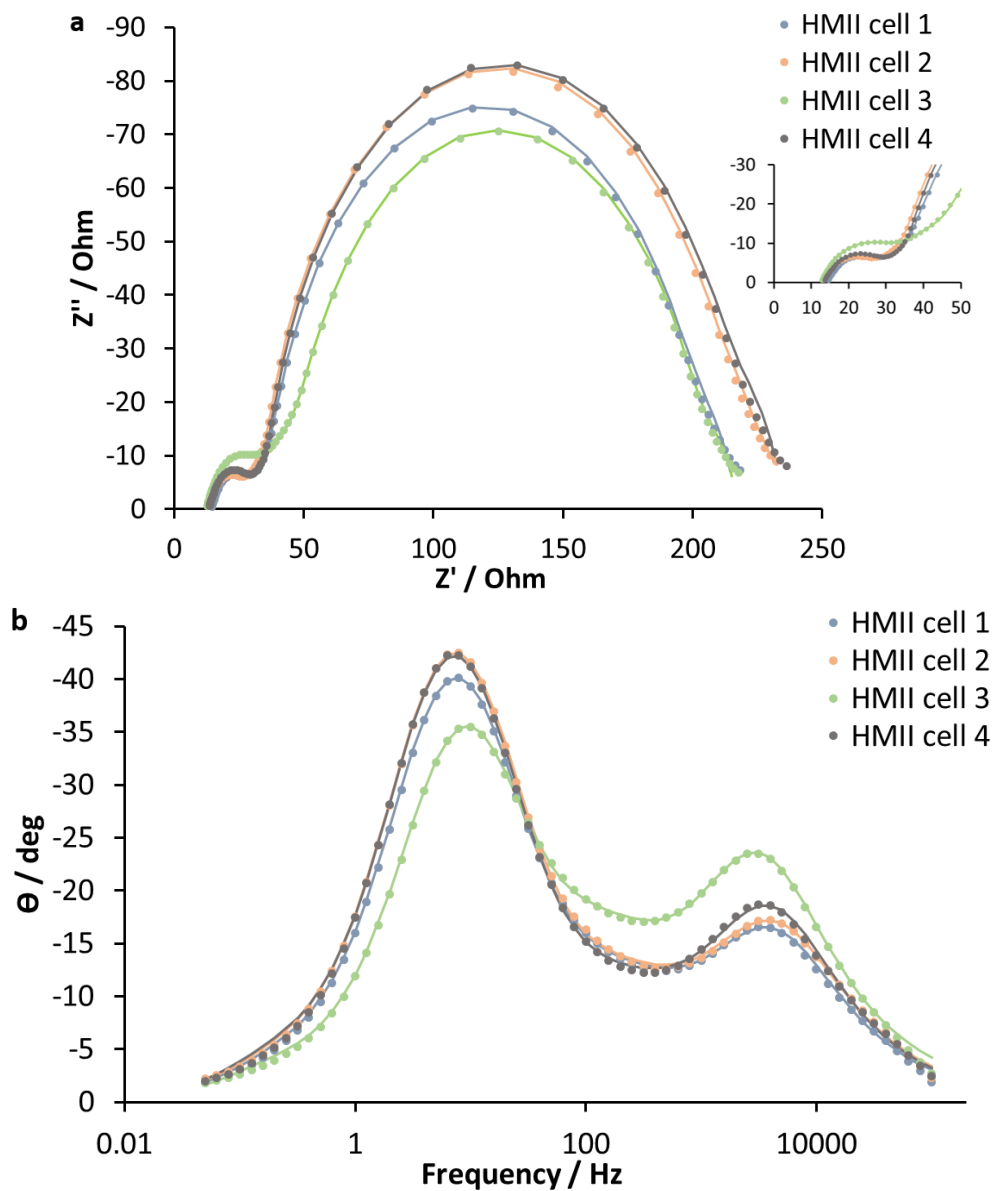

Fig. S18. EIS data of the multiple DSCs with electrolyte HMII. Solid lines represent fitted curves, dotted lines represent experimental data. (a) Nyquist plots, the expansion shows the high frequency region. (b) Bode plot.

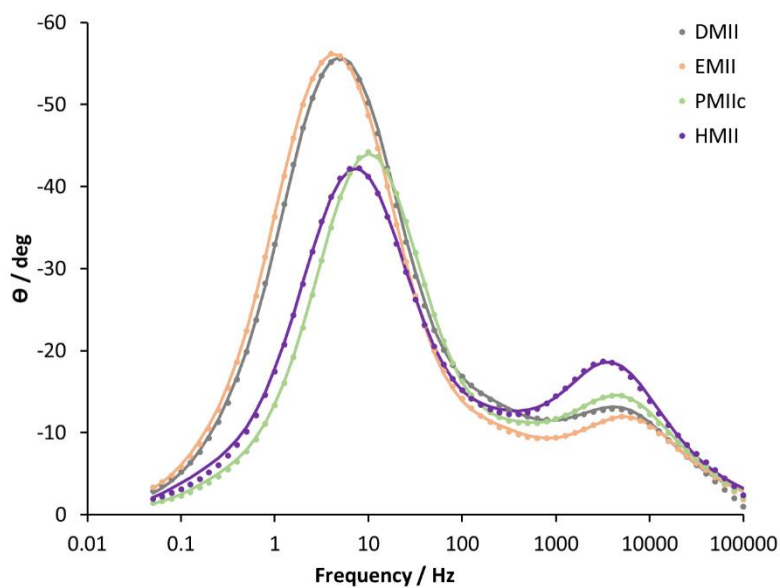

Fig. S19. Bode plot of the DSCs with electrolytes BMIIa, BMIIc, BMIIe, BMII f, BMIIh, BMIIi. Solid lines represent fitted curves, dotted lines represent experimental data.

Table S4. EIS parameters for multiple DSCs using electrolytes based on imidazolium ionic liquids with different lengths of side-chain.

| Electrolyte  | $R_{rec} / \Omega$ | $C_{\mu} / \mu F$ | $R_{tr} / \Omega$ | $\tau / ms$ | $\tau_i / ms$ | $Ld / \mu m$ | $R_s / \Omega$ | $R_{Pt} / \Omega$ | $C_{Pt} / \mu F$ |
|--------------|--------------------|-------------------|-------------------|-------------|---------------|--------------|----------------|-------------------|------------------|
| DMII cell 1  | 266                | 484               | 10                | 129         | 5             | 61           | 11             | 6                 | 6                |
| DMII cell 2  | 269                | 416               | 22                | 112         | 9             | 42           | 12             | 6                 | 7                |
| DMII cell 3  | 381                | 768               | 4                 | 293         | 3             | 122          | 13             | 4                 | 6                |
| DMII cell 4  | 337                | 363               | 26                | 122         | 9             | 43           | 12             | 5                 | 7                |
| EMII cell 1  | 331                | 472               | 12                | 156         | 6             | 62           | 11             | 8                 | 5                |
| EMII cell 2  | 299                | 464               | 19                | 139         | 9             | 48           | 13             | 6                 | 5                |
| PMIIc cell 1 | 134.00             | 405.35            | 8.37              | 54.35       | 3.39          | 48.01        | 12.64          | 7.90              | 6.05             |
| PMIIc cell 2 | 140.70             | 297.41            | 18.99             | 41.84       | 5.64          | 32.66        | 12.33          | 7.75              | 5.45             |
| PMIIc cell 3 | 134.30             | 265.95            | 26.49             | 35.72       | 7.04          | 27.02        | 14.93          | 9.76              | 6.97             |
| HMII cell 1  | 164                | 329               | 35                | 54          | 12            | 26           | 14             | 10                | 5                |
| HMII cell 2  | 179                | 330               | 32                | 59          | 11            | 28           | 13             | 10                | 5                |
| HMII cell 3  | 155                | 256               | 62                | 40          | 16            | 19           | 12             | 13                | 6                |
| HMII cell 4  | 179                | 328               | 30                | 59          | 10            | 29           | 13             | 11                | 5                |

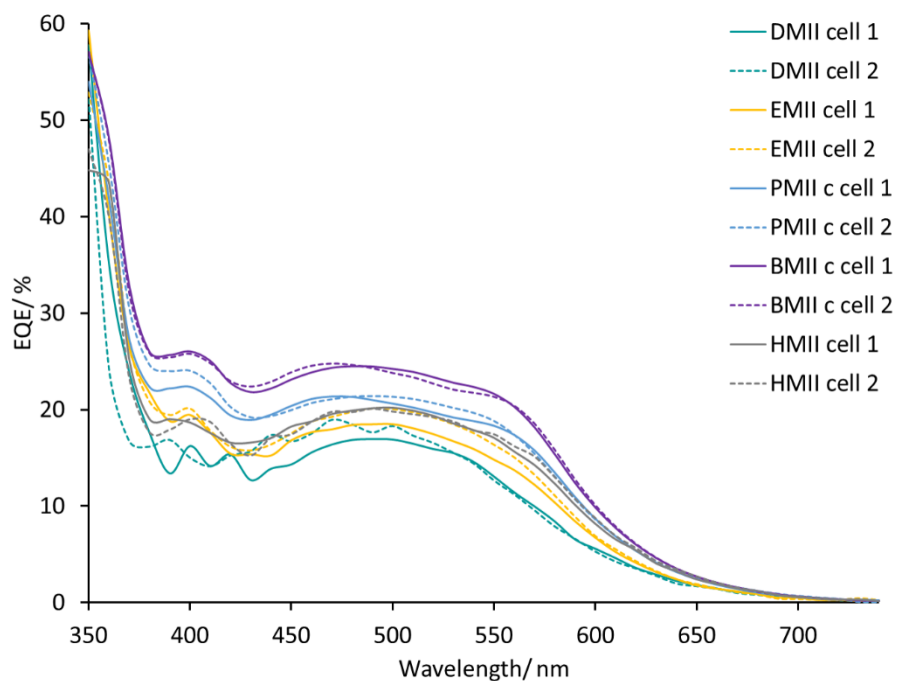

Fig. S20. EQE spectra for multiple DSCs using electrolytes DMII, EMII, PMIIc, BMIIc and HMII.

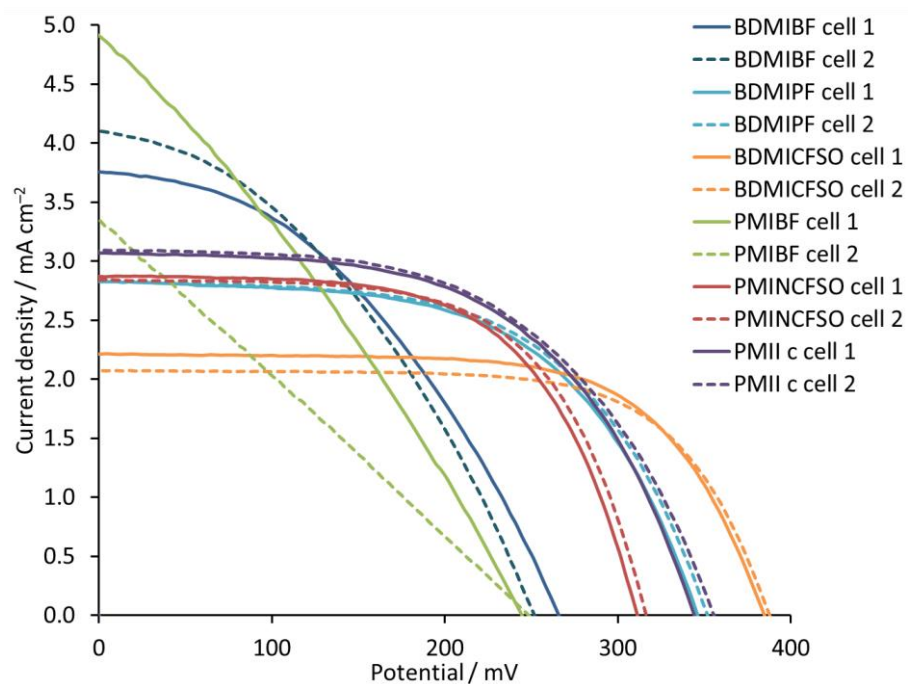

Fig. S21. J-V curves for the multiple DSCs with electrolytes based on imidazolium ionic liquids with different counter ions.

Table S5. Parameters for multiple DSCs using electrolytes based on imidazolium ionic liquids with different counter ions.

| Electrolyte     | $J_{sc} / \text{mA cm}^{-2}$ | $V_{oc} / \text{mV}$ | $ff / \%$ | $\eta / \%$ | Rel. $\eta / \%$ |
|-----------------|------------------------------|----------------------|-----------|-------------|------------------|
| BDMIBF cell 1   | 3.80                         | 266                  | 41        | 0.41        | 7.3              |
| BDMIBF cell 2   | 4.09                         | 251                  | 39        | 0.40        | 7.1              |
| BDMIPF cell 1   | 2.84                         | 351                  | 58        | 0.57        | 10.2             |
| BDMIPF cell 2   | 2.83                         | 346                  | 57        | 0.56        | 10.0             |
| BDMICFSO cell 1 | 2.22                         | 385                  | 66        | 0.56        | 10.0             |
| BDMICFSO cell 2 | 2.07                         | 387                  | 67        | 0.54        | 9.6              |
| PMIBF cell 1    | 4.90                         | 244                  | 30        | 0.35        | 6.3              |
| PMIBF cell 2    | 3.34                         | 248                  | 26        | 0.21        | 3.8              |
| PMINCFSO cell 1 | 2.84                         | 316                  | 62        | 0.56        | 10.0             |
| PMINCFSO cell 2 | 2.88                         | 311                  | 61        | 0.55        | 9.8              |
| N719            | 12.53                        | 654                  | 68        | 5.60        | 100              |
